# Supplementary material
Source: PubMed Central journal article supplement (PMC5030116)
Supplement: NIHMS774128-supplement.pdf [file NIHMS774128-supplement.pdf]

Appendix Figure 1

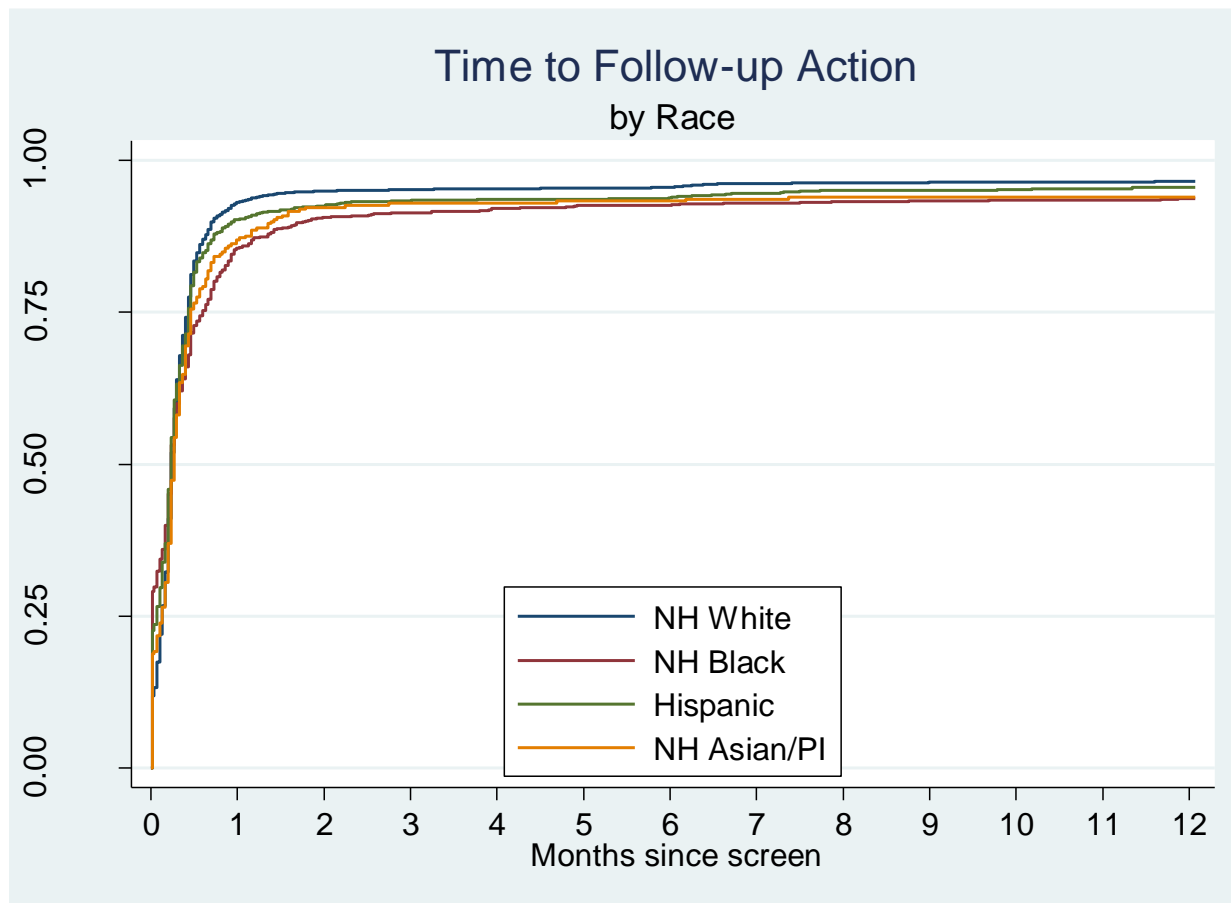

NH, Non-Hispanic; PI, Pacific Islander

Appendix Figure 2

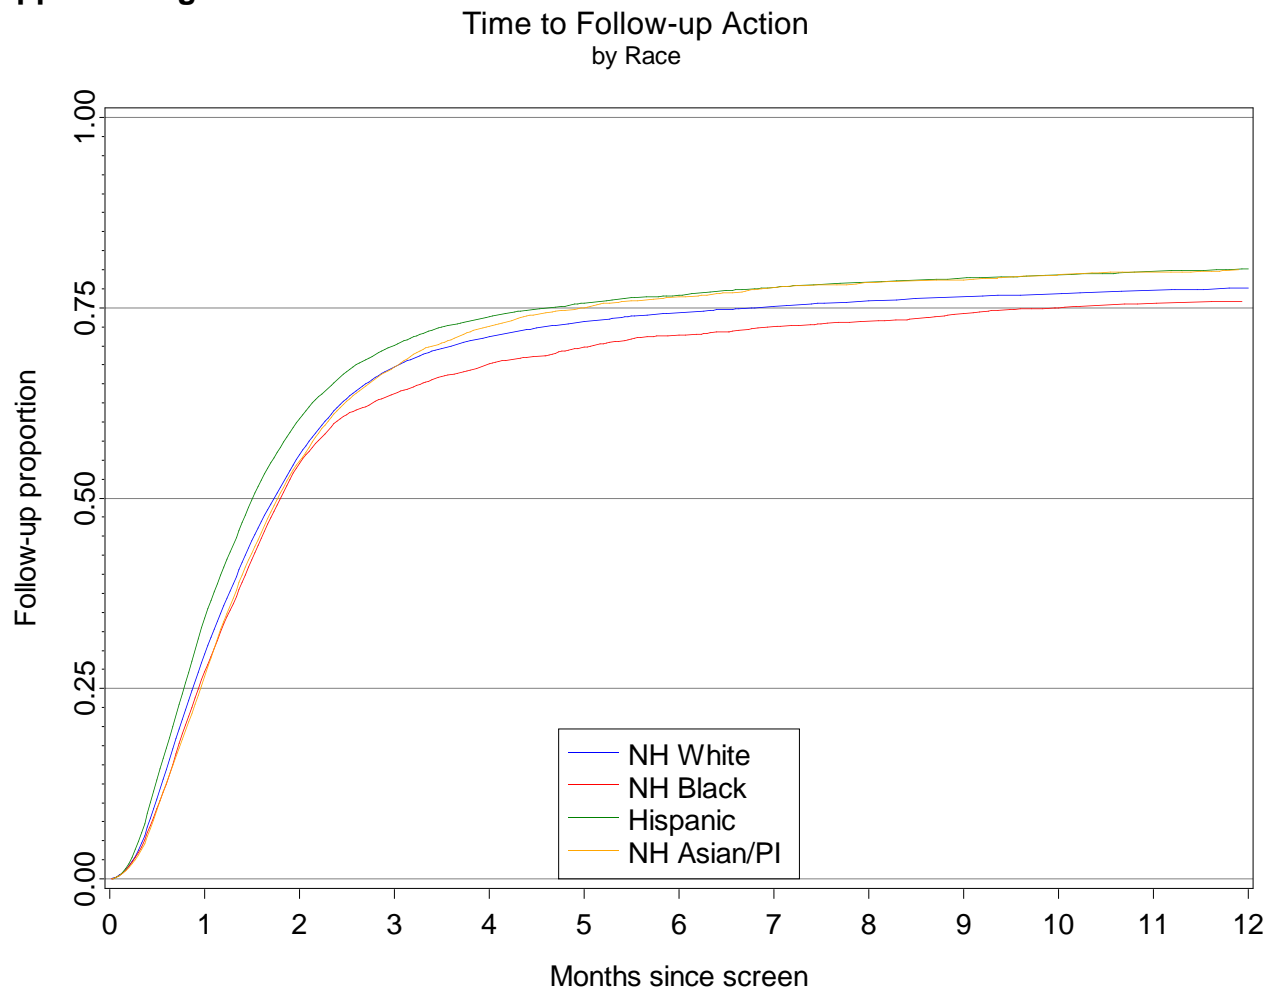

NH, Non-Hispanic; PI, Pacific Islander

**Appendix**  
**Follow-Up of Abnormal Breast and Colorectal Cancer Screening by Race/Ethnicity**  
**McCarthy et al.**

**Appendix Table 1.** Logistic Regression of Timely Follow-up Defined as 6 Months (9 Months for BI-RADS 3)<sup>a</sup>

| Race/Ethnicity | OR (95% CI)         |                     |                     |                         |                         |
|----------------|---------------------|---------------------|---------------------|-------------------------|-------------------------|
|                | Breast <sup>a</sup> | Breast <sup>b</sup> | Breast <sup>c</sup> | Colorectal <sup>a</sup> | Colorectal <sup>c</sup> |
| N total        | N=17,735            | N=6561              | N=6444              | n=21,228                | n=21,037                |
| N.H. white     | 1.00<br>(ref)       | 1.00<br>(ref)       | 1.00<br>(ref)       | 1.00<br>(ref)           | 1.00<br>(ref)           |
| N.H. black     | 0.64<br>(0.49-0.84) | 0.65<br>(0.49-0.86) | 0.77<br>(0.56-1.06) | 0.93<br>(0.83,1.03)     | 1.05<br>(0.94,1.17)     |
| Hispanic       | 0.93<br>(0.69-1.25) | 0.90<br>(0.65-1.26) | 1.16<br>(0.80-1.67) | 1.12<br>(1.03,1.21)     | 1.20<br>(1.11,1.31)     |
| Asian/PI       | 0.73<br>(0.46-1.16) | 0.64<br>(0.38-1.09) | 0.64<br>(0.38-1.10) | 1.08<br>(0.98,1.20)     | 1.06<br>(0.96,1.17)     |

<sup>a</sup> Logistic regression model adjusted for study site, age, year of test. (All sites)

<sup>b</sup> Logistic regression model adjusted for study site, age, year of test. (VT excluded)

<sup>c</sup> Logistic regression model adjusted for study site, age, year of test, income (ZIP code median), and insurance. (VT excluded from mammography analysis)

BI-RADS, Breast Imaging-Reporting and Data System; N.H., Non-Hispanic; PI, Pacific Islander; VT, University of Vermont

**Appendix**  
**Follow-Up of Abnormal Breast and Colorectal Cancer Screening by Race/Ethnicity**  
**McCarthy et al.**

**Appendix Table 2.** Logistic Regression of Timely Follow-up of Abnormal Screening Tests by Study Site and Screening Type  
OR (95% CI)

| Race/Ethnicity | Breast <sup>a</sup> |                     |                     |                     | Colorectal <sup>b</sup> |                     |                        |
|----------------|---------------------|---------------------|---------------------|---------------------|-------------------------|---------------------|------------------------|
|                | D-BWH<br>n=4,915    | UPenn<br>n=1,649    | VT<br>n=11,175      | GH<br>n=938         | KPNC<br>n=12,223        | KPSC<br>n=12,936    | PHHS-<br>UTSW<br>n=414 |
| N.H. white     | 1.00<br>(ref)       | 1.00<br>(ref)       | 1.00<br>(ref)       | 1.00<br>(ref)       | 1.00<br>(ref)           | 1.00<br>(ref)       | 1.00<br>(ref)          |
| N.H. black     | 0.73<br>(0.51-1.05) | 0.32<br>(0.19-0.53) | 0.31<br>(0.12-0.78) | 1.00<br>(0.53,1.88) | 1.04<br>(0.89,1.22)     | 0.98<br>(0.85,1.13) | 0.63<br>(0.32,1.24)    |
| Hispanic       | 0.97<br>(0.68-1.38) | 0.37<br>(0.08-1.64) | 0.91<br>(0.45-1.86) | 0.95<br>(0.50,1.84) | 1.03<br>(0.92,1.17)     | 1.18<br>(1.07,1.31) | 0.84<br>(0.42,1.69)    |
| Asian/PI       | 0.66<br>(0.36-1.19) | 0.67<br>(0.15-2.91) | 0.92<br>(0.34-2.52) | 0.91<br>(0.60,1.37) | 0.95<br>(0.85,1.07)     | 1.04<br>(0.90,1.19) | 0.32<br>(0.10,1.08)    |

<sup>a</sup> Logistic regression model adjusted for age and year of test.

<sup>b</sup> Logistic regression model adjusted for age, year of test, insurance, and income (ZIP code median).

DBWH, Geisel School of Medicine at Dartmouth and Brigham and Women's Hospital; GH, Group Health Research Institute; KPNC, Kaiser Permanente Northern California; KPSC, Kaiser Permanente Southern California; N.H., Non-Hispanic; PHHS-UTSW, Parkland Health and Hospital System - University of Texas Southwestern; PI, Pacific Islander; UPenn, University of Pennsylvania; VT, University of Vermont
